# Supplementary material for: Identification of reference genes in blood before and after entering the plateau for SYBR green RT-qPCR studies
Source: PeerJ. 2017 Sep 27;5:e3726. doi: 10.7717/peerj.3726 (PMC5622608; doi:10.7717/peerj.3726)
Supplement: Supplemental Information 1 [file peerj-05-3726-s001.xlsx]

## Sheet: Sheet1
Supplemental File: Ct value of the eight candidate reference genes in blood before and after entering plateau
	GAPDH	β-actin	18s RNA	β2-MG	PPIA	RPL13A	TBP	SDHA
beforeX1	18.34	13.25	15.43	16.06	16.67	13.79	21.17	19.73
beforeX2	18.5	13.46	16.29	15.46	16.66	13.91	20.96	20.17
beforeX3	18.31	13.46	15.79	15.48	16.83	13.89	21.52	20.01
beforeX4	18.34	13.37	16.63	15.86	16.67	13.98	21.39	19.41
beforeX5	18.52	13.63	14.97	16.25	17.09	13.71	21.24	19.56
beforeX6	18.42	13.27	15.92	16.04	17.02	14	21.75	19.88
afterX1	17.85	13.84	15.32	16.17	16.38	13.39	20.5	19.67
afterX2	18.03	14.89	15.57	16.9	17.08	13.62	22.23	19.84
afterX3	17.68	13.88	16.02	15.71	16.96	13.77	21.65	20.18
afterX4	17.81	14.68	15.9	16.86	17.26	13.64	22.6	20.57
afterX5	18.26	14.54	16.1	16.39	17.11	13.72	21.6	20.07
afterX6	18.4	14.28	15.82	16.52	16.98	13.44	22.08	20.3
